# Supplementary material for: A new genus and two new species of freshwater mussels (Unionidae) from western Indochina
Source: PubMed Central journal article supplement (PMC6411986; doi:10.1038/s41598-019-39365-1), 2019-03-11
Supplement: 41598_2019_39365_MOESM1_ESM.pdf [file 41598_2019_39365_MOESM1_ESM.pdf]

## SUPPLEMENTARY INFORMATION

# A new genus and two new species of freshwater mussels (Unionidae) from western Indochina

Ekaterina S. Konopleva, John M. Pfeiffer, Ilya V. Vikhrev, Alexander V. Kondakov, Mikhail Yu. Gofarov, Olga V. Aksenova, Zau Lunn, Nyein Chan & Ivan N. Bolotov

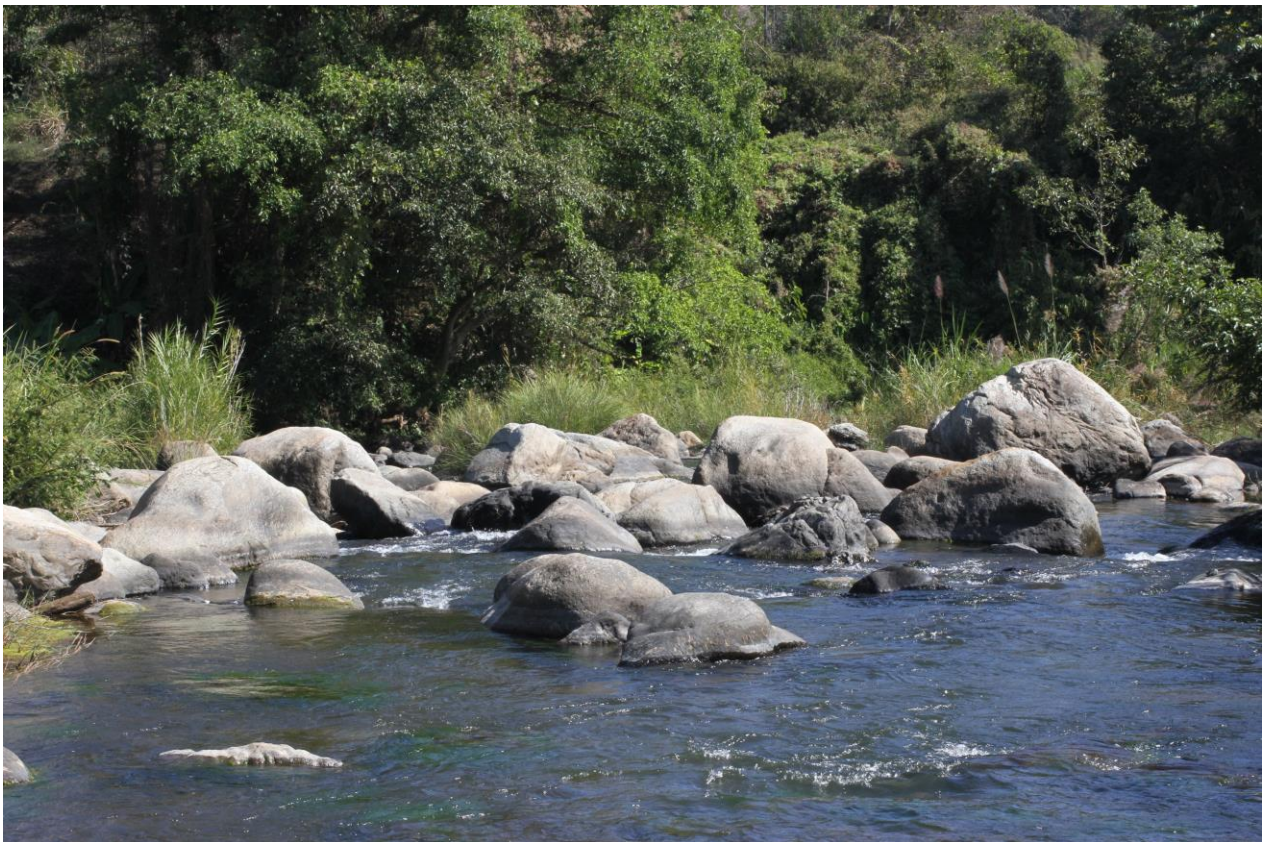

Habitat of *Yaukthwa paiensis* **sp. nov.**, Pai River basin, northwestern Thailand (Photo: Zachary S. Randall)

# Contents

Supplementary Table 1. List of sequences used in this study, including the species, locality and NCBI's GenBank accession numbers

Supplementary Table 2. List of species in the tribe Contradentini Modell, 1942 (Unionidae: Rectidentinae)

Supplementary Table 3. Habitat characteristics for *Yaukthwa* spp.

Supplementary Table 4. Primer sequences for PCR amplification and sequencing

Supplementary Table 5. Alignment length prior to and after treatment for length variability in GBlocks v. 0.91b

Supplementary Table 6. Models of sequence evolution for each partition based on Akaike Information Criterion (AICc) of MEGA6

Supplementary References

**Supplementary Table 1.** List of sequences used in this study, including the species, locality and NCBI's GenBank accession numbers

| Species                                                               | Locality                                                                    | Specimen Voucher | COI      | 16S rRNA | 28S rRNA |
|-----------------------------------------------------------------------|-----------------------------------------------------------------------------|------------------|----------|----------|----------|
| <b>PSEUDODONTINAE Frierson, 1927</b>                                  |                                                                             |                  |          |          |          |
| <b>Pseudodontini Frierson, 1927</b>                                   |                                                                             |                  |          |          |          |
| <i>Pseudodon avae</i> (Theobald, 1873)                                | Myanmar: Ayeyarwady River basin, a tributary of Lake Indawgyi               | biv110_5         | KX865858 | KX865629 | KX865730 |
| <i>P. avae</i> (Theobald, 1873)                                       | Myanmar: Ayeyarwady River basin, a tributary of Lake Indawgyi               | biv110_10        | KX865859 | KX865630 | KX865731 |
| <i>P. avae</i> (Theobald, 1873)                                       | Myanmar: Ayeyarwady River basin, a tributary of Lake Indawgyi               | biv110_11        | KX865860 | KX865631 | KX865732 |
| <i>P. bogani</i> Bolotov, Kondakov & Konopleva, 2017                  | Myanmar: Sittaung River basin, Kanni River                                  | biv 241/4        | MF352216 | MF352290 | MF352348 |
| <i>P. bogani</i> Bolotov, Kondakov & Konopleva, 2017                  | Myanmar: Sittaung River basin, Kanni River                                  | biv 241/5        | MF352217 | MF352291 | MF352349 |
| <i>P. bogani</i> Bolotov, Kondakov & Konopleva, 2017                  | Myanmar: Sittaung River basin, Kanni River                                  | biv 241/8        | MF352218 | MF352292 | MF352350 |
| <i>P. manueli</i> Konopleva, Kondakov & Vikhrev, 2017                 | Myanmar: Sittaung River basin, Pyowne River                                 | biv 246/1        | MF352228 | MF352300 | MF352358 |
| <i>P. manueli</i> Konopleva, Kondakov & Vikhrev, 2017                 | Myanmar: Sittaung River basin, Pyowne River                                 | biv 246/3        | MF352229 | MF352301 | MF352359 |
| <i>P. manueli</i> Konopleva, Kondakov & Vikhrev, 2017                 | Myanmar: Sittaung River basin, Pyowne River                                 | biv 246/8        | MF352230 | MF352302 | MF352360 |
| <b>Pilsbryconchini Bolotov, Vikhrev &amp; Tumpeesuwan, 2017</b>       |                                                                             |                  |          |          |          |
| <i>Bineurus</i> aff. <i>mouhotii</i> (Lea, 1863) sp.1                 | Laos: Mekong River basin, Nam Long River                                    | biv_182/2        | KX865876 | KX865647 | KX865747 |
| <i>B.</i> aff. <i>mouhotii</i> (Lea, 1863) sp.2                       | Thailand: Mekong River basin, Loei River                                    | biv_119/1        | KX865879 | KX865650 | KX865750 |
| <i>B.</i> aff. <i>mouhotii</i> (Lea, 1863) sp.3                       | Laos: Mekong River basin                                                    | UMMZ:304649      | KP795026 | KP795051 | KP795009 |
| <i>Monodontina cambodjensis</i> (Petit de la Saussaye, 1865)          | Cambodia: Mekong River basin, Tonle Sap River: Pursat River                 | UMMZ:304350      | KP795028 | KF011262 | KP795011 |
| <i>M.</i> aff. <i>vondembuschiana</i> (Lea, 1840) sp.1                | Thailand: Mekong River basin, Phong River                                   | biv122           | KX865861 | KX865632 | KX865733 |
| <i>M.</i> aff. <i>vondembuschiana</i> (Lea, 1840) sp.2                | Laos: Mekong River basin                                                    | UMMZ:304650      | KP795029 | KP795052 | AF400694 |
| <i>Pilsbryconcha compressa</i> (Martens, 1860)                        | Thailand: Mekong River basin, artificial pond near the Ban Nong-Bua village | biv_116/1        | KX865872 | KX865643 | KX865744 |
| <i>P.</i> aff. <i>exilis</i> (Lea, 1838) sp.1                         | Cambodia: Mekong River basin                                                | UMMZ:304647      | KP795024 | KP795049 | KP795007 |
| <b>PARREYSIINAE Henderson 1935</b>                                    |                                                                             |                  |          |          |          |
| <b>Indochinellini Bolotov, Pfeifer, Vikhrev &amp; Konopleva, 2018</b> |                                                                             |                  |          |          |          |
| <i>Indochinella pugio</i> (Benson, 1862)                              | Myanmar: Ayeyarwady River basin, Lake Nant Phar                             | biv_258/1        | MF352261 | MF352325 | MF352386 |
| <i>I. pugio</i> (Benson, 1862)                                        | Myanmar: Ayeyarwady River basin, Lake Nant Phar                             | biv_258/2        | MF352262 | MF352326 | MF352389 |
| <i>I. pugio</i> (Benson, 1862)                                        | Myanmar: Ayeyarwady River basin, Lake Myaung                                | biv_268/1        | MF352285 | n/a      | n/a      |

| Species                                                     | Locality                                                     | Specimen Voucher   | COI      | 16S rRNA | 28S rRNA |
|-------------------------------------------------------------|--------------------------------------------------------------|--------------------|----------|----------|----------|
| <i>I. pugio</i> (Benson, 1862)                              | Myanmar: Ayeyarwady River basin, Lake Myaung                 | biv_268/2          | MF352286 | MF352346 | MF352403 |
| <i>I. pugio</i> (Benson, 1862)                              | Myanmar: Ayeyarwady River basin, Lake Myaung                 | biv_268/4          | MF352287 | MF352347 | MF352404 |
| <i>I. pugio</i> (Benson, 1862)                              | Myanmar: Ayeyarwady River basin, Chindwin River: Paukin Lake | UA<USA-AL>:20739.1 | JN243899 | KP795046 | JN243879 |
| <i>I. pugio</i> (Benson, 1862)                              | Myanmar: Tavoy River                                         | biv_147/3          | KX865852 | KX865623 | KX865724 |
| <i>I. pugio</i> (Benson, 1862)                              | Myanmar: Tavoy River                                         | biv_147/10         | KX865853 | KX865624 | KX865725 |
| <i>I. pugio</i> (Benson, 1862)                              | Myanmar: Tavoy River                                         | biv_147/18         | KX865854 | KX865625 | KX865726 |
| <i>I. pugio</i> (Benson, 1862)                              | Myanmar: Tavoy River                                         | biv_148/4          | KX865855 | KX865626 | KX865727 |
| <i>I. pugio</i> (Benson, 1862)                              | Myanmar: Tavoy River                                         | biv_148/7          | KX865856 | KX865627 | KX865728 |
| <i>I. pugio</i> (Benson, 1862)                              | Myanmar: Tavoy River                                         | biv_148/15         | KX865857 | KX865628 | KX865729 |
| <i>I. pugio</i> (Benson, 1862)                              | Myanmar: Sittaung River basin, Myit Kyi Pauk stream          | biv_251/1          | MF352242 | MF352312 | MF352370 |
| <i>I. pugio</i> (Benson, 1862)                              | Myanmar: Sittaung River basin, Myit Kyi Pauk stream          | biv_251/2          | MF352243 | MF352313 | MF352371 |
| <i>I. pugio</i> (Benson, 1862)                              | Myanmar: Sittaung River basin, Myit Kyi Pauk stream          | biv_251/3          | MF352244 | MF352314 | MF352372 |
| <i>Indonaia caerulea</i> (Lea, 1831)                        | India: Krishna River basin, fish pond                        | RRc1               | KT869141 | n/a      | n/a      |
| <i>I. andersoniana</i> (Nevill, 1877)                       | Myanmar: Ayeyarwady River basin, Lake Indawgyi               | biv_108/1          | KX865835 | KX865606 | KX865709 |
| <i>I. aff. khadakvaslaensis</i> (Ray, 1966) sp.1            | India                                                        | SBM7               | KF690124 | n/a      | n/a      |
| <i>I. lima</i> (Simpson, 1900)                              | India: Krishna River, Nagarjuna Sagar                        | RR11               | KP268827 | n/a      | n/a      |
| <i>I. subclathrata</i> (Martens, 1899) <b>comb. nov.</b>    | Myanmar: Manipur River                                       | biv_338/1          | MH700479 | n/a      | n/a      |
| <i>I. subclathrata</i> (Martens, 1899) <b>comb. nov.</b>    | Myanmar: Chindwin River                                      | biv_347/1          | MH700480 | n/a      | MH697870 |
| <i>Radiatula mouhoti</i> Vikhrev, Bolotov & Konopleva, 2017 | Myanmar: Sittaung River near Taungoo                         | biv_248/1          | MF352234 | MF352305 | MF352363 |
| <i>R. cf. bonneaudii</i> (Eydoux, 1838) sp.1                | Myanmar: Ayeyarwady River basin, Tar Pein River              | biv_260/5          | MF352266 | MF352330 | MF352390 |
| <i>R. myitkyinae</i> (Prashad, 1930)                        | Myanmar: Ayeyarwady River basin, Lake Indawgyi               | biv_107/1          | KX865838 | KX865609 | KX865710 |
| <i>Scabies humilis</i> (Lea, 1856)                          | Thailand: Mekong River basin, Chi River                      | biv_126/1          | KX865844 | KX865615 | KX865716 |
| <i>S. phaselus</i> (Lea, 1856)                              | Thailand: Mekong River basin, Chi River                      | biv_124/1          | KX865850 | KX865621 | KX865722 |
| <i>S. aff. humilis</i> (Lea, 1856) sp.3                     | Cambodia: Mekong River basin                                 | UMMZ:304646        | KP795023 | KP795048 | KP795006 |
| <b>RECTIDENTINAE Modell, 1942</b>                           |                                                              |                    |          |          |          |
| <b>Contradentini Modell, 1942</b>                           |                                                              |                    |          |          |          |
| <i>Contradens contradens</i> (Lea, 1838)                    | West Malaysia: Pahang River                                  | ANSP:389059        | DQ191411 | n/a      | AF400692 |
| <i>C. contradens</i> (Lea, 1838)                            | Malaysia                                                     | X076               | KX051294 | n/a      | n/a      |
| <i>C. contradens</i> (Lea, 1838)                            | Malaysia                                                     | BIV1787            | KX051270 | n/a      | n/a      |
| <i>C. contradens</i> (Lea, 1838)                            | Malaysia                                                     | BIV1789            | KX051269 | n/a      | n/a      |
| <i>C. contradens</i> (Lea, 1838)                            | Malaysia                                                     | BIV1765            | KX051265 | n/a      | n/a      |
| <i>C. contradens</i> (Lea, 1838)                            | Malaysia                                                     | BIV1638            | KX051259 | n/a      | n/a      |

| Species                                                        | Locality                                  | Specimen Voucher | COI      | 16S rRNA | 28S rRNA |
|----------------------------------------------------------------|-------------------------------------------|------------------|----------|----------|----------|
| <i>C. contradens</i> (Lea, 1838)                               | Malaysia                                  | X054             | KX051251 | n/a      | n/a      |
| <i>C. contradens</i> (Lea, 1838)                               | Malaysia                                  | X060             | KX051250 | n/a      | n/a      |
| <i>C. contradens</i> (Lea, 1838)                               | Malaysia                                  | X072             | KX051247 | n/a      | n/a      |
| <i>C. contradens</i> (Lea, 1838)                               | Malaysia                                  | biv_211_2        | MF352289 | n/a      | MF352406 |
| <i>C. contradens</i> (Lea, 1838)                               | Malaysia                                  | BIV1767          | KX051253 | n/a      | n/a      |
| <i>C. contradens</i> (Lea, 1838)                               | Malaysia                                  | BIV1695          | KX051249 | n/a      | n/a      |
| <i>C. contradens</i> (Lea, 1838)                               | Malaysia                                  | X132             | KX051257 | n/a      | n/a      |
| <i>C. contradens</i> (Lea, 1838)                               | Malaysia                                  | X100             | KX051246 | n/a      | n/a      |
| <i>C. contradens</i> (Lea, 1838)                               | Malaysia                                  | X208             | KX051258 | n/a      | n/a      |
| <i>C. contradens</i> (Lea, 1838)                               | Malaysia                                  | BIV1764          | KX051254 | n/a      | n/a      |
| <i>C. contradens</i> (Lea, 1838)                               | Malaysia                                  | BIV1777          | KX051262 | n/a      | n/a      |
| <i>C. contradens</i> (Lea, 1838)                               | Malaysia                                  | BIV1748          | KX051244 | n/a      | n/a      |
| <i>C. contradens</i> (Lea, 1838)                               | Malaysia                                  | BIV1709          | KX051267 | n/a      | n/a      |
| <i>C. contradens</i> (Lea, 1838)                               | Malaysia                                  | BIV1757          | KX051243 | n/a      | n/a      |
| <i>C. contradens</i> (Lea, 1838)                               | Malaysia                                  | BIV1710          | KX051268 | n/a      | n/a      |
| <i>C. contradens</i> (Lea, 1838)                               | Malaysia                                  | BIV1839          | KX051266 | n/a      | n/a      |
| <i>C. contradens</i> (Lea, 1838)                               | Malaysia                                  | BIV1639          | KX051264 | n/a      | n/a      |
| <i>C. contradens</i> (Lea, 1838)                               | Malaysia                                  | X231             | KX051261 | n/a      | n/a      |
| <i>C. contradens</i> (Lea, 1838)                               | Malaysia                                  | BIV1714          | KX051256 | n/a      | n/a      |
| <i>C. contradens</i> (Lea, 1838)                               | Malaysia                                  | BIV1758          | KX051255 | n/a      | n/a      |
| <i>C. contradens</i> (Lea, 1838)                               | Malaysia                                  | X43              | KX051252 | n/a      | n/a      |
| <i>C. aff. contradens</i> (Lea, 1838) sp.1                     | Cambodia: Mekong River basin              | UMMZ:304652      | KP795034 | KP795054 | KP795016 |
| <i>C. eximius</i> (Lea, 1856)                                  | Thailand: Mekong River basin, Chi River   | biv_127_1        | KX865936 | n/a      | KX865807 |
| <i>C. eximius</i> (Lea, 1856)                                  | Thailand: Mekong River basin, Chi River   | biv_127_2        | KX865937 | n/a      | KX865808 |
| <i>C. eximius</i> (Lea, 1856)                                  | Thailand: Mekong River basin, Chi River   | biv_127_3        | KX865938 | KX865686 | KX865809 |
| <i>C. eximius</i> (Lea, 1856)                                  | Thailand: Mekong River basin, Phong River | biv_121_1        | KX865939 | KX865687 | KX865810 |
| <i>C. eximius</i> (Lea, 1856)                                  | Thailand: Mekong River basin, Phong River | biv_121_2        | KX865940 | KX865688 | KX865811 |
| <i>C. eximius</i> (Lea, 1856)                                  | Thailand: Mekong River basin, Phong River | biv_121_3        | KX865941 | KX865689 | KX865812 |
| <i>C. comptus</i> (Deshayes & Jullien, 1874) <b>comb. nov.</b> | Thailand: Mekong River basin, Loei River  | biv_119_5        | KX865928 | KX865682 | KX865799 |
| <i>C. comptus</i> (Deshayes & Jullien, 1874) <b>comb. nov.</b> | Thailand: Mekong River basin, Loei River  | biv_119_6        | KX865929 | KX865683 | KX865800 |
| <i>C. comptus</i> (Deshayes & Jullien, 1874) <b>comb. nov.</b> | Laos: Mekong River basin, Nam Long River  | biv_182_3        | KX865930 | KX865684 | KX865801 |
| <i>C. comptus</i> (Deshayes & Jullien, 1874) <b>comb. nov.</b> | Laos: Mekong River basin, Nam Long River  | biv_182_12       | KX865931 | KX865685 | KX865802 |
| <i>C. comptus</i> (Deshayes & Jullien, 1874) <b>comb. nov.</b> | Laos: Mekong River basin, Nam Long River  | biv_182_10       | KX865932 | n/a      | KX865803 |
| <i>C. comptus</i> (Deshayes & Jullien, 1874) <b>comb. nov.</b> | Laos: Mekong River basin, Nam Pe River    | biv_184_1        | KX865933 | n/a      | KX865804 |

| Species                                                        | Locality                                                                                         | Specimen Voucher | COI      | 16S rRNA | 28S rRNA |
|----------------------------------------------------------------|--------------------------------------------------------------------------------------------------|------------------|----------|----------|----------|
| <i>C. comptus</i> (Deshayes & Jullien, 1874) <b>comb. nov.</b> | Laos: Mekong River basin, Nam Pe River                                                           | biv_184_3        | KX865934 | n/a      | KX865805 |
| <i>C. comptus</i> (Deshayes & Jullien, 1874) <b>comb. nov.</b> | Laos: Mekong River basin, Nam Pe River                                                           | biv_185_2        | KX865935 | n/a      | KX865806 |
| <i>C. comptus</i> (Deshayes & Jullien, 1874) <b>comb. nov.</b> | Cambodia: Mekong River basin, Tonle Kong River                                                   | ICH-00471        | MH345973 | MH346013 | MH345993 |
| <i>C. comptus</i> (Deshayes & Jullien, 1874) <b>comb. nov.</b> | Cambodia: Mekong River basin, Tonle Kong River                                                   | ICH-00474        | MH345974 | MH346014 | MH345994 |
| <i>C. comptus</i> (Deshayes & Jullien, 1874) <b>comb. nov.</b> | Cambodia: Mekong River basin, upstream of fishing village near the confluence of Tonle Sap River | ICH-00576        | MH345975 | MH346015 | MH345995 |
| <i>C. comptus</i> (Deshayes & Jullien, 1874) <b>comb. nov.</b> | Cambodia: Mekong River basin, upstream of fishing village near the confluence of Tonle Sap River | ICH-00577        | MH345976 | MH346016 | MH345996 |
| <i>C. comptus</i> (Deshayes & Jullien, 1874) <b>comb. nov.</b> | Thailand: Mekong River basin                                                                     | ICH-00750        | MH345977 | MH346017 | MH345997 |
| <i>C. comptus</i> (Deshayes & Jullien, 1874) <b>comb. nov.</b> | Thailand: Mekong River basin                                                                     | ICH-00752        | MH345978 | MH346018 | MH345998 |
| <i>C. misellus</i> (Morelet, 1865) <b>comb. nov.</b>           | Thailand: Chao Phraya River basin, Ping River                                                    | 2014-0685        | MH345986 | MH346026 | MH346006 |
| <i>C. misellus</i> (Morelet, 1865) <b>comb. nov.</b>           | Thailand: Chao Phraya River basin, Ping River                                                    | 2014-0687        | MH345987 | MH346027 | MH346007 |
| <i>C. pallegoixi</i> (Sowerby, 1867) <b>comb. nov.</b>         | Thailand: Mekong River Basin, Mun River drainage, Pao river                                      | 2014-0613        | MH345988 | MH346028 | MH346008 |
| <i>C. pallegoixi</i> (Sowerby, 1867) <b>comb. nov.</b>         | Thailand: Mekong River Basin, Mun River drainage, Pao river                                      | 2014-0614        | MH345989 | MH346029 | MH346009 |
| <i>C. pallegoixi</i> (Sowerby, 1867) <b>comb. nov.</b>         | Thailand: Mekong River Basin, Mun River drainage, Pao river                                      | 2014-0616        | MH345990 | MH346030 | MH346010 |
| <i>C. sp.</i> 'Vieng Phou Kha'                                 | Laos: Mekong River basin, a tributary of Nam Fa River near Vieng Phou Kha                        | biv202_2         | KY561630 | KY561645 | KY561662 |
| <i>C. sp.</i> 'Vieng Phou Kha'                                 | Laos: Mekong River basin, a tributary of Nam Fa River near Vieng Phou Kha                        | biv203_5         | KY561631 | KY561646 | KY561663 |
| <i>C. sp.</i> 'Vieng Phou Kha'                                 | Laos: Mekong River basin, a tributary of Nam Fa River near Vieng Phou Kha                        | biv203_4         | KY561632 | KY561647 | KY561664 |
| <i>Trapezoides foliaceus</i> (Gould, 1843)                     | Thailand: Mae Klong river basin, Pracham Mai River                                               | 2012-0443        | MH345979 | MH346019 | MH345999 |
| <i>T. foliaceus</i> (Gould, 1843)                              | Thailand: Mae Klong river basin, Pracham Mai River                                               | 2012-0445        | MH345980 | MH346020 | MH346000 |
| <i>T. foliaceus</i> (Gould, 1843)                              | Thailand: Mae Klong river basin, Song Karia River                                                | 2012-0457        | MH345981 | MH346021 | MH346001 |
| <i>T. foliaceus</i> (Gould, 1843)                              | Thailand: Mae Klong river basin, Song Karia River                                                | 2012-0458        | MH345982 | MH346022 | MH346002 |
| <i>T. foliaceus</i> (Gould, 1843)                              | Thailand: Mae Klong river basin, Tributary of Pracham Mai River                                  | ICH-02059        | MH345983 | MH346023 | MH346003 |
| <i>T. foliaceus</i> (Gould, 1843)                              | Thailand: Mae Klong river basin, Pachee River                                                    | ICH-02104        | MH345984 | MH346024 | MH346004 |
| <i>T. foliaceus</i> (Gould, 1843)                              | Thailand: Mae Klong river basin, Pachee River                                                    | ICH-02105        | MH345985 | MH346025 | MH346005 |
| <i>Physunio modelli</i> Brandt, 1974                           | Thailand: Mekong River basin, Chi River                                                          | biv_125_2        | KX865883 | KX865654 | KX865754 |
| <i>P. modelli</i> Brandt, 1974                                 | Thailand: Mekong River basin, Chi River                                                          | biv_125_3        | KX865884 | KX865655 | KX865755 |

| Species                                                                                     | Locality                                           | Specimen Voucher               | COI      | 16S rRNA | 28S rRNA |
|---------------------------------------------------------------------------------------------|----------------------------------------------------|--------------------------------|----------|----------|----------|
| <i>P. modelli</i> Brandt, 1974                                                              | Thailand: Mekong River basin, Chi River            | biv_131_1                      | KX865885 | n/a      | KX865756 |
| <i>P. modelli</i> Brandt, 1974                                                              | Thailand: Mekong River basin, Chi River            | biv_131_2                      | KX865886 | n/a      | KX865757 |
| <i>P. modelli</i> Brandt, 1974                                                              | Thailand: Mekong River basin, Chi River            | biv_131_3                      | KX865887 | n/a      | KX865758 |
| <i>P. modelli</i> Brandt, 1974                                                              | Thailand: Mekong River basin, Chi River            | biv_131                        | KX865888 | n/a      | KX865759 |
| <i>P. modelli</i> Brandt, 1974                                                              | Thailand: Mekong River basin, Phong River          | biv205_1                       | KY561627 | n/a      | KY561659 |
| <i>P. modelli</i> Brandt, 1974                                                              | Thailand: Mekong River basin, Phong River          | biv205_2                       | KY561628 | n/a      | KY561660 |
| <i>P. modelli</i> Brandt, 1974                                                              | Thailand: Mekong River basin, Phong River          | biv205_3                       | KY561629 | n/a      | KY561661 |
| <i>P. sp.</i> 'Contradens'                                                                  | Cambodia: Mekong River basin                       | UMMZ:304653                    | KP795035 | KP795055 | KP795017 |
| <i>P. sp.</i> 'Trapezoideus'                                                                | Laos: Mekong River basin, Nam Ou River             | UMMZ:304347/U<br>MMZ:MC:304347 | KP795036 | KF011265 | KP795018 |
| <i>P. superbus</i> (Lea, 1843)                                                              | Malaysia                                           | X180                           | KX051282 | n/a      | n/a      |
| <i>P. superbus</i> (Lea, 1843)                                                              | Malaysia                                           | BIV1699                        | KX051280 | n/a      | n/a      |
| <i>P. superbus</i> (Lea, 1843)                                                              | Malaysia                                           | X236                           | KX051277 | n/a      | n/a      |
| <i>P. superbus</i> (Lea, 1843)                                                              | Malaysia                                           | X239                           | KX051276 | n/a      | n/a      |
| <i>P. superbus</i> (Lea, 1843)                                                              | Malaysia                                           | BIV1776                        | KX051278 | n/a      | n/a      |
| <i>P. superbus</i> (Lea, 1843)                                                              | Malaysia                                           | BIV1698                        | KX051281 | n/a      | n/a      |
| <i>P. superbus</i> (Lea, 1843)                                                              | Malaysia                                           | BIV1756                        | KX051279 | n/a      | n/a      |
| <i>P. superbus</i> (Lea, 1843)                                                              | Malaysia                                           | X246                           | KX051275 | n/a      | n/a      |
| <i>Yaukthwa nesemanni</i> (Konopleva, Vikhrev & Bolotov, 2017) <b>gen. &amp; comb. nov.</b> | Myanmar: Sittaung River basin, Thauk Ye Kupt River | biv_144_14                     | KX865906 | KX865663 | KX865777 |
| <i>Y. nesemanni</i> (Konopleva, Vikhrev & Bolotov, 2017) <b>gen. &amp; comb. nov.</b>       | Myanmar: Sittaung River basin, Thauk Ye Kupt River | biv_144_25                     | KX865907 | KX865664 | KX865778 |
| <i>Y.a nesemanni</i> (Konopleva, Vikhrev & Bolotov, 2017) <b>gen. &amp; comb. nov.</b>      | Myanmar: Sittaung River basin, Thauk Ye Kupt River | biv_144_19                     | KX865908 | KX865665 | KX865779 |
| <i>Y. nesemanni</i> (Konopleva, Vikhrev & Bolotov, 2017) <b>gen. &amp; comb. nov.</b>       | Myanmar: Sittaung River basin, Thauk Ye Kupt River | biv_255_2                      | MF352254 | n/a      | MF352379 |
| <i>Y. nesemanni</i> (Konopleva, Vikhrev & Bolotov, 2017) <b>gen. &amp; comb. nov.</b>       | Myanmar: Sittaung River basin, Thauk Ye Kupt River | biv_255_3                      | MF352255 | n/a      | MF352380 |
| <i>Y. nesemanni</i> (Konopleva, Vikhrev & Bolotov, 2017) <b>gen. &amp; comb. nov.</b>       | Myanmar: Sittaung River basin, Thauk Ye Kupt River | biv_255_4                      | MF352256 | n/a      | MF352381 |
| <i>Y. panhai</i> (Konopleva, Bolotov & Kondakov, 2017) <b>comb. nov.</b>                    | Myanmar: Sittaung River basin, Kyan Hone River     | biv_138_4                      | KX865909 | KX865666 | KX865780 |
| <i>Y. panhai</i> (Konopleva, Bolotov & Kondakov, 2017) <b>comb. nov.</b>                    | Myanmar: Sittaung River basin, Kyan Hone River     | biv_138_7                      | KX865910 | KX865667 | KX865781 |
| <i>Y. panhai</i> (Konopleva, Bolotov & Kondakov, 2017) <b>comb. nov.</b>                    | Myanmar: Sittaung River basin, Kyan Hone River     | biv_155_4                      | KX865911 | KX865668 | KX865782 |
| <i>Y. panhai</i> (Konopleva, Bolotov & Kondakov, 2017) <b>comb. nov.</b>                    | Myanmar: Sittaung River basin, Kyan Hone River     | biv_155_25                     | KX865912 | KX865669 | KX865783 |

| Species                                                                  | Locality                                                               | Specimen Voucher | COI      | 16S rRNA | 28S rRNA |
|--------------------------------------------------------------------------|------------------------------------------------------------------------|------------------|----------|----------|----------|
| <i>Y. panhai</i> (Konopleva, Bolotov & Kondakov, 2017) <b>comb. nov.</b> | Myanmar: Sittaung River basin, Kyan Hone River                         | biv_138_12       | KX865913 | KX865670 | KX865784 |
| <i>Y. panhai</i> (Konopleva, Bolotov & Kondakov, 2017) <b>comb. nov.</b> | Myanmar: Sittaung River basin, Kyan Hone River                         | biv_155_11       | KX865914 | KX865671 | KX865785 |
| <i>Y. inlenensis</i> <b>sp. nov.</b>                                     | Myanmar: Salween River basin, Inle Lake Channel                        | biv_114_1        | KX865915 | KX865672 | KX865786 |
| <i>Y. inlenensis</i> <b>sp. nov.</b>                                     | Myanmar: Salween River basin, Inle Lake Channel                        | biv_114_3        | KX865916 | KX865673 | KX865787 |
| <i>Y. inlenensis</i> <b>sp. nov.</b>                                     | Myanmar: Salween River basin, Mway Stream                              | biv_143_2        | KX865917 | KX865674 | KX865788 |
| <i>Y. inlenensis</i> <b>sp. nov.</b>                                     | Myanmar: Salween River basin, Inle Lake Channel                        | biv_114_2        | KX865918 | KX865675 | KX865789 |
| <i>Y. inlenensis</i> <b>sp. nov.</b>                                     | Myanmar: Salween River basin, Inle Lake Channel                        | biv_115_1        | KX865919 | n/a      | KX865790 |
| <i>Y. inlenensis</i> <b>sp. nov.</b>                                     | Myanmar: Salween River basin, Inle Lake Channel                        | biv_115_3        | KX865920 | n/a      | KX865791 |
| <i>Y. inlenensis</i> <b>sp. nov.</b>                                     | Myanmar: Salween River basin, Inle Lake Channel                        | biv_115_2        | KX865921 | n/a      | KX865792 |
| <i>Y. inlenensis</i> <b>sp. nov.</b>                                     | Myanmar: Salween River basin, Mway Stream                              | biv_139_7        | KX865922 | KX865676 | KX865793 |
| <i>Y. inlenensis</i> <b>sp. nov.</b>                                     | Myanmar: Salween River basin, Mway Stream                              | biv_139_15       | KX865923 | KX865677 | KX865794 |
| <i>Y. inlenensis</i> <b>sp. nov.</b>                                     | Myanmar: Salween River basin, Mway Stream                              | biv_139_18       | KX865924 | KX865678 | KX865795 |
| <i>Y. inlenensis</i> <b>sp. nov.</b>                                     | Myanmar: Salween River basin, Nam Pilu River                           | biv_140_22       | KX865925 | KX865679 | KX865796 |
| <i>Y. inlenensis</i> <b>sp. nov.</b>                                     | Myanmar: Salween River basin, Nam Pilu River                           | biv_140_24       | KX865926 | KX865680 | KX865797 |
| <i>Y. inlenensis</i> <b>sp. nov.</b>                                     | Myanmar: Salween River basin, Nam Pilu River                           | biv_140_25       | KX865927 | KX865681 | KX865798 |
| <i>Y. paiensis</i> <b>sp. nov.</b>                                       | Thailand: Salween River basin, Khong River                             | ICH-00638        | MH345970 | MH346011 | MH345991 |
| <i>Y. paiensis</i> <b>sp. nov.</b>                                       | Thailand: Salween River basin, Khong River                             | ICH-00639        | MH345971 | MH346012 | MH345992 |
| <i>Y. paiensis</i> <b>sp. nov.</b>                                       | Thailand: Salween River basin, Khong River                             | ICH-00640        | MH345972 | n/a      | n/a      |
| <i>Y. cf. dalliana</i> (Frierson, 1913)                                  | Myanmar: Ayeyarwady River basin, Nanyinhka Chaung River                | biv_111_2        | KX865889 | KX865656 | KX865760 |
| <i>Y. cf. dalliana</i> (Frierson, 1913)                                  | Myanmar: Ayeyarwady River basin, Nanyinhka Chaung River                | biv_111_21       | KX865890 | KX865657 | KX865761 |
| <i>Y. cf. dalliana</i> (Frierson, 1913)                                  | Myanmar: Ayeyarwady River basin, Nanyinhka Chaung River                | biv_111_43       | KX865891 | KX865658 | KX865762 |
| <i>Y. cf. dalliana</i> (Frierson, 1913)                                  | Myanmar: Ayeyarwady River basin, Mali Hka River basin, Pan Khai stream | biv_101_4        | KX865892 | n/a      | n/a      |
| <i>Y. cf. dalliana</i> (Frierson, 1913)                                  | Myanmar: Ayeyarwady River basin, Mali Hka River basin, Nam Shu River   | biv_105_24       | KX865893 | n/a      | n/a      |
| <i>Y. cf. dalliana</i> (Frierson, 1913)                                  | Myanmar: Ayeyarwady River basin, Mali Hka River basin, Pan Khai stream | biv_101_5        | KX865894 | KX865659 | KX865763 |
| <i>Y. cf. dalliana</i> (Frierson, 1913)                                  | Myanmar: Ayeyarwady River basin, Mali Hka River basin, Pan Khai stream | biv_101_6        | KX865895 | n/a      | KX865764 |
| <i>Y. cf. dalliana</i> (Frierson, 1913)                                  | Myanmar: Ayeyarwady River basin, Mali Hka River basin, Mansakun River  | biv_103_17       | KX865896 | n/a      | KX865765 |



| Species                                      | Locality                                                                    | Specimen Voucher | COI      | 16S rRNA | 28S rRNA |
|----------------------------------------------|-----------------------------------------------------------------------------|------------------|----------|----------|----------|
| <i>Y. cf. dalliana</i> (Frierson, 1913)      | Myanmar: Ayeyarwady River basin, Mali Hka River basin, Mansakun River       | biv_103_18       | KX865897 | n/a      | KX865766 |
| <i>Y. cf. dalliana</i> (Frierson, 1913)      | Myanmar: Ayeyarwady River basin, Mali Hka River basin, Mansakun River       | biv_103_19       | KX865898 | n/a      | KX865767 |
| <i>Y. cf. dalliana</i> (Frierson, 1913)      | Myanmar: Ayeyarwady River basin, Mali Hka River basin, Nam Balak River      | biv_102_7        | KX865899 | KX865660 | KX865768 |
| <i>Y. cf. dalliana</i> (Frierson, 1913)      | Myanmar: Ayeyarwady River basin, Mali Hka River basin, Nam Balak River      | biv_102_11       | KX865900 | KX865661 | KX865769 |
| <i>Y. cf. dalliana</i> (Frierson, 1913)      | Myanmar: Ayeyarwady River basin, Mali Hka River basin, Nam Balak River      | biv_102_14       | KX865901 | KX865662 | KX865770 |
| <i>Y. cf. dalliana</i> (Frierson, 1913)      | Myanmar: Ayeyarwady River basin, Mali Hka River basin, Nam Shu River        | biv_105_31       | KX865902 | n/a      | KX865771 |
| <i>Y. cf. dalliana</i> (Frierson, 1913)      | Myanmar: Ayeyarwady River basin, Mali Hka River basin, Nam Shu River        | biv_105_32       | KX865903 | n/a      | KX865772 |
| <i>Y. cf. dalliana</i> (Frierson, 1913)      | Myanmar: Ayeyarwady River basin, Mali Hka River basin, unnamed stream       | biv_104_34       | KX865904 | n/a      | KX865773 |
| <i>Y. cf. dalliana</i> (Frierson, 1913)      | Myanmar: Ayeyarwady River basin, Mali Hka River basin, unnamed stream       | biv_104_35       | KX865905 | n/a      | KX865774 |
| <i>Y. cf. dalliana</i> (Frierson, 1913)      | Myanmar: Ayeyarwady River basin, Mali Hka River basin, Pan Khai stream      | biv_101_1        | n/a      | n/a      | KX865775 |
| <i>Y. cf. dalliana</i> (Frierson, 1913)      | Myanmar: Ayeyarwady River basin, Mali Hka River basin, Nam Shu River        | biv_105_22       | n/a      | n/a      | KX865776 |
| <b>Rectidentini Modell, 1942</b>             |                                                                             |                  |          |          |          |
| <i>Ensidens cf. ingallsianus</i> (Lea, 1852) | Laos: Mekong River basin                                                    | NCSM84889        | KX822641 | n/a      | KX822598 |
| <i>E. sp.1</i>                               | Laos: Mekong River basin                                                    | NCSM84902        | KX822642 | n/a      | KX822599 |
| <i>E. aff. sagittarius</i> (Lea, 1856) sp.1  | Cambodia: Mekong River basin                                                | UMMZ:304651      | KP795033 | KP795053 | KP795015 |
| <i>E. aff. sagittarius</i> (Lea, 1856) sp.2  | Thailand: Mekong River basin, artificial pond near the Ban Nong-Bua village | biv_117_1        | KX865942 | KX865690 | KX865813 |
| <i>E. aff. sagittarius</i> (Lea, 1856) sp.2  | Thailand: Mekong River basin, artificial pond near the Ban Nong-Bua village | biv_117_2        | KX865943 | KX865691 | KX865814 |
| <i>E. aff. sagittarius</i> (Lea, 1856) sp.2  | Thailand: Mekong River basin, artificial pond near the Ban Nong-Bua village | biv_117_3        | KX865944 | KX865692 | KX865815 |
| <i>E. aff. sagittarius</i> (Lea, 1856) sp.3  | Thailand: Mekong River basin, Chi River                                     | biv_128_1        | KX865945 | KX865693 | KX865816 |
| <i>E. aff. sagittarius</i> (Lea, 1856) sp.3  | Thailand: Mekong River basin, Chi River                                     | biv_128_2        | KX865946 | KX865694 | KX865817 |
| <i>E. aff. sagittarius</i> (Lea, 1856) sp.3  | Thailand: Mekong River basin, Chi River                                     | biv_128_3        | KX865947 | n/a      | KX865818 |
| <i>E. aff. sagittarius</i> (Lea, 1856) sp.3  | Thailand: Mekong River basin, Chi River                                     | biv_123_1        | KX865948 | n/a      | KX865819 |
| <i>E. aff. sagittarius</i> (Lea, 1856) sp.3  | Thailand: Mekong River basin, Chi River                                     | biv_123_2        | KX865949 | KX865695 | KX865820 |
| <i>E. aff. sagittarius</i> (Lea, 1856) sp.3  | Thailand: Mekong River basin, Chi River                                     | biv_123_3        | KX865950 | KX865696 | KX865821 |
| <i>Hyriopsis gracilis</i> Haas, 1910*        | Thailand: Mekong River basin                                                | n/a              | KX822643 | n/a      | KX822600 |
| <i>H. gracilis</i> Haas, 1910*               | Thailand: Mekong River basin, Chi River                                     | biv_130_1        | KX865951 | KX865697 | KX865822 |
| <i>H. gracilis</i> Haas, 1910*               | Thailand: Mekong River basin, Chi River                                     | biv_130_2        | KX865952 | KX865698 | KX865823 |
| <i>H. gracilis</i> Haas, 1910*               | Thailand: Mekong River basin, Chi River                                     | biv_130_3        | KX865953 | n/a      | KX865824 |

| Species                                           | Locality                                             | Specimen Voucher | COI      | 16S rRNA | 28S rRNA |
|---------------------------------------------------|------------------------------------------------------|------------------|----------|----------|----------|
|                                                   | River                                                |                  |          |          |          |
| <i>H. sp.1</i>                                    | Thailand: Chao Phraya basin                          | 839512HbB        | KX383948 | n/a      | n/a      |
| <i>H. bialatus</i> Simpson, 1900                  | Malaysia                                             | BIV1775          | KX051273 | n/a      | n/a      |
| <i>H. myersiana</i> (Lea, 1856)                   | Thailand                                             | n/a              | KX822645 | n/a      | KX822602 |
| <i>H. desowitzi</i> Brandt, 1974                  | Thailand                                             | n/a              | KX822644 | n/a      | KX822601 |
| <i>Rectidens sumatrensis</i> (Dunker, 1852)       | Malaysia                                             | n/a              | KX822664 | n/a      | KX822620 |
| <i>R. sumatrensis</i> (Dunker, 1852)              | Malaysia                                             | biv 211_1        | MF352288 | n/a      | MF352405 |
| <b>Margaritiferidae (outgroup)</b>                |                                                      |                  |          |          |          |
| <i>Gibbosula laosensis</i> (Lea, 1863)            | Laos: Mekong River basin, Nam Long River             | biv 186_1        | JX497731 | KC845943 | KT343741 |
| <i>Margaritifera dahurica</i> (Middendorff, 1850) | Far East of Russia: Amur River basin, Ilistaya River | biv 92_6         | KJ161516 | KJ943526 | KT343747 |

\*Do et al.<sup>1</sup> recommended using this name for what has been historically listed as *Hyriopsis bialatus* Simpson, 1900 only for the Mekong River basin populations.

## Supplementary Table 2. List of species in the tribe Contradentini Modell, 1942 (Unionidae: Rectidentinae)

| Genus                            | Species                                                                                              | Type locality                                                                                              | Distribution range                                                                          |
|----------------------------------|------------------------------------------------------------------------------------------------------|------------------------------------------------------------------------------------------------------------|---------------------------------------------------------------------------------------------|
| <i>Trapezoides</i> Simpson 1900  | <i>T. foliaceus</i> (Gould, 1843) [type species]                                                     | Tavoy, British Burmah                                                                                      | Mae Klong Basin, Thailand. The type series is reported from "Tavoy" (see Taxonomic Account) |
| <i>Yaukthwa</i> <b>gen. nov.</b> | <i>Y. nesemanni</i> (Konopleva, Vikhrev & Bolotov, 2017) <b>gen. &amp; comb. nov.</b> [type species] | Thauk Ye Kupt River, Sittaung Basin, Myanmar                                                               | Thauk Ye Kupt River, Sittaung Basin, Myanmar                                                |
|                                  | * <i>Y. dalliana</i> (Frierson, 1913) <b>comb. nov.</b>                                              | Lashio River near Lashio, Ayeyarwady Basin, northern Shan State, Myanmar                                   | Ayeyarwady Basin, Myanmar                                                                   |
|                                  | <i>Y. inlenensis</i> <b>sp. nov.</b>                                                                 | Myanmar, Salween River drainage, Mway Stream, a tributary of Nam Pilu River                                | Lake Inle Region, Salween Basin, Myanmar                                                    |
|                                  | <i>Y. paiensis</i> <b>sp. nov.</b>                                                                   | Thailand, Salween River Drainage, Pai District, Mae Hong Son Province, Khong River, tributary of Pai River | Pai River, Salween Basin, Thailand                                                          |
|                                  | <i>Y. panhai</i> (Konopleva, Bolotov & Kondakov, 2017) <b>comb. nov.</b>                             | Kyan Hone River, Sittaung Basin, Myanmar                                                                   | Kyan Hone River, Sittaung Basin, Myanmar                                                    |
|                                  | * <i>Y. peguensis</i> (Anthony, 1865) <b>comb. nov.</b>                                              | Pegu                                                                                                       | Bago River, Myanmar                                                                         |
|                                  | <i>Y. zayleymanensis</i> (Preston, 1912) <b>comb. nov.</b>                                           | Bhamo                                                                                                      | Ayeyarwady Basin, Myanmar                                                                   |
| <i>Contradens</i> Haas, 1911     | <i>C. contradens</i> (Lea, 1838) [type species]                                                      | Java                                                                                                       | Malaysia and probably Greater Sunda Islands                                                 |
|                                  | <i>C. comptus</i> (Deshayes & Jullien, 1874) <b>comb. nov.</b>                                       | Peam Chelang, Cambodia                                                                                     | Mekong Basin, Laos, Thailand and Cambodia                                                   |
|                                  | <i>C. eximius</i> (Lea, 1856)                                                                        | Siam                                                                                                       | Mekong Basin, Thailand                                                                      |
|                                  | <i>C. misellus</i> (Morelet, 1865) <b>comb. nov.</b>                                                 | Siam                                                                                                       | Chao Phraya Basin, Thailand                                                                 |
|                                  | <i>C. pallegoixi</i> (Sowerby, 1867) <b>comb. nov.</b>                                               | Siam                                                                                                       | Mun River, Mekong Basin, Thailand                                                           |
|                                  | * <i>C. fulvaster</i> (Drouet & Chaper, 1892)                                                        | Borneo                                                                                                     | Borneo                                                                                      |

| Genus                         | Species                                                                                                                                                                                                             | Type locality                                                                                    | Distribution range     |
|-------------------------------|---------------------------------------------------------------------------------------------------------------------------------------------------------------------------------------------------------------------|--------------------------------------------------------------------------------------------------|------------------------|
|                               | * <i>C. inaequalis</i> (Rochebrune, 1881)                                                                                                                                                                           | Sombor Rapids, Cambodia                                                                          | Mekong Basin, Cambodia |
|                               | * <i>C. peninsularis</i> (Simpson, 1900) <b>comb. nov.</b>                                                                                                                                                          | Sumatra                                                                                          | Sumatra, Indonesia     |
|                               | * <i>C. semmelinki</i> (Martens, 1891)                                                                                                                                                                              | Tanah Laut, South Borneo                                                                         | Borneo                 |
|                               | * <i>C. graciosus</i> (Philippi, 1843) [ <i>Unio anceps</i> Deshayes in Deshayes & Jullien, 1874 was removed from the synonymy of <i>C. graciosus</i> to the genus <i>Scabies</i> by Pfeiffer et al. <sup>2</sup> ] | “New Holland” [erroneous]                                                                        | Unknown                |
|                               | * <i>C. subcircularis</i> (Brandt, 1974) [most likely not a <i>Contradens</i> member, but a representative of the <i>Leoparreiysiini</i> <sup>2</sup> ]                                                             | Mekong River between Takek and Nakon Panom in Laos                                               | Mekong Basin, Laos     |
|                               | ** <i>C. aff. contradens</i> (Lea, 1838)                                                                                                                                                                            | n/a                                                                                              | Mekong Basin, Cambodia |
|                               | ** <i>C.</i> “Vieng Phou Kha”                                                                                                                                                                                       | n/a                                                                                              | Mekong Basin, Laos     |
| <i>Physunio</i> Simpson, 1900 | <i>P. superbus</i> (Lea, 1843) [type species]                                                                                                                                                                       | “New Holland” [erroneous; most probable type locality: the coast of Malacca, in the river Souzi] | Malaysia               |
|                               | <i>P. modelli</i> Brandt, 1974                                                                                                                                                                                      | Thailand: Maenam Pong at Pong Nip Dam; Province Khon Kaen                                        | Mekong Basin, Thailand |
|                               | * <i>P. cambodiensis</i> (Lea, 1856)                                                                                                                                                                                | Tackrong River, at Korat, Cambodia                                                               | Mekong Basin, Cambodia |
|                               | * <i>P. inornatus</i> (Lea, 1856)                                                                                                                                                                                   | Siam                                                                                             | Mekong Basin, Thailand |
|                               | * <i>P. micropterus</i> (Morelet, 1866)                                                                                                                                                                             | Cambodia                                                                                         | Mekong Basin, Cambodia |
|                               | * <i>P. friersoni</i> Simpson, 1914 [most likely a <i>Lamellidens</i> member]                                                                                                                                       | Assam, India                                                                                     | Assam, India           |
|                               | ** <i>P. sp.</i> “Contradens”                                                                                                                                                                                       | n/a                                                                                              | Mekong Basin, Cambodia |
|                               | ** <i>P. sp.</i> “Trapezoideus”                                                                                                                                                                                     | n/a                                                                                              | Mekong Basin, Laos     |

“\*\*” indicates nominal taxa with an uncertain status that are in need of a further integrative revision; and “\*\*\*” indicates species-level phylogenetic lineages that are still not attributed to a certain Linnean name. This table is compiled using the MUSSELP database<sup>3</sup>. n/a – not available.

### Supplementary Table 3. Habitat characteristics for *Yaukthwa* spp.

| Species                                         | Habitat                              | Flow in microhabitat | Substrate    |
|-------------------------------------------------|--------------------------------------|----------------------|--------------|
| <i>Y. paiensis</i> <b>sp. nov.</b>              | Mountain stream with rapids and runs | Slow                 | Sand, clay   |
| <i>Y. inlenensis</i> <b>sp. nov.</b>            | Mountain streams                     | Slow, moderate       | Clay, gravel |
| <i>Y. nesemami</i> <b>gen. &amp; comb. nov.</b> | Mountain river                       | Moderately strong    | Sand, gravel |
| <i>Y. panhai</i> <b>comb. nov.</b>              | Mountain river                       | Moderately strong    | Sand, gravel |
| <i>Y. cf. dalliana</i>                          | Mountain rivers and streams          | Moderately strong    | Sand, gravel |

### Supplementary Table 4. Primer sequences for PCR amplification and sequencing

| Gene fragment   | Primer's name | Direction | Sequence (5'-3')           | Reference |
|-----------------|---------------|-----------|----------------------------|-----------|
| <i>COI</i>      | LoboF1        | Forward   | kbtchacaaycayaargayathgg   | Ref. 4    |
|                 | LoboR1        | Reverse   | taaacytcwggrtgwccraaraayca |           |
| <i>16S rRNA</i> | 16Sar         | Forward   | cgctgtttatcaaaaacat        | Ref. 5    |
|                 | 16sar-L-myt   | Forward   | cgactgtttaacaaaacat        | Ref. 6    |
|                 | 16sbr-H-myt   | Reverse   | ccgttctgaactcagctcatgt     |           |
| <i>28S rRNA</i> | C1            | Forward   | accgctgaatttaagcat         | Ref. 7    |
|                 | D2            | Reverse   | tccgtgtttcaagacgg          |           |

**Supplementary Table 5.** Alignment length prior to and after treatment for length variability in GBlocks v. 0.91b<sup>8</sup>

| Partition       | Original length of alignment (bp) | Fraction selected by GBlocks (%) | Final length of alignment (bp) |
|-----------------|-----------------------------------|----------------------------------|--------------------------------|
| <i>COI</i>      | 660                               | 100                              | 660                            |
| <i>28S rRNA</i> | 845                               | 92                               | 775                            |
| <i>16S rRNA</i> | 513                               | 87                               | 445                            |

**Supplementary Table 6.** Models of sequence evolution for each partition based on corrected Akaike Information Criterion (AICc) of MEGA6<sup>9</sup>

| Partition               | Model | Gamma | Invariant |
|-------------------------|-------|-------|-----------|
| <i>COI</i>              |       |       |           |
| 1st codon of <i>COI</i> | HKY   | n/a   | n/a       |
| 2nd codon of <i>COI</i> | GTR   | 2.056 | n/a       |
| 3rd codon of <i>COI</i> | TN93  | 0.894 | 0.542     |
| <i>28S rRNA</i>         | GTR   | 0.620 | 0.395     |
| <i>16S rRNA</i>         | GTR   | 0.619 | 0.426     |

n/a – not available.

**Supplementary References**

1. Do, V.T., Tuan, L.Q. & Bogan, A.E. Freshwater mussels (Bivalvia: Unionida) of Vietnam: diversity, distribution, and conservation status. *Freshwater Mollusk Biology and Conservation* **21**, 1–18 (2018).
2. Pfeiffer, J. M., Graf, D. L., Cummings, K. S. & Page, L. M. Molecular phylogeny and taxonomic revision of two enigmatic freshwater mussel genera (Bivalvia: Unionidae incertae sedis: Harmandia and Unionetta) reveals a diverse clade of Southeast Asian Parreysiinae. *Journal of Molluscan Studies*; DOI:10.1093/mollus/eyy028 (2018).
3. Graf, D. L. & Cummings, K. S. The freshwater mussels (Unionoida) of the World (and other less consequential bivalves), updated 9 August 2018. MUSSEL Project Web Site. Available: <http://www.mussel-project.net> (2018).
4. Lobo, J. *et al.* Enhanced primers for amplification of DNA barcodes from a broad range of marine metazoans. *BMC Ecology* **13**, 34; DOI:10.1186/1472-6785-13-34 (2013).
5. Palumbi, S.R. Nucleic acids II: The polymerase chain reaction. in *Molecular Systematics* (Hillis D.M., Moritz C., Mable B.K., eds.). 205–247 (Sinauer Associates Inc., Sunderland, MA, 1996).
6. Lydeard, C., Mulvey, M., Davis, G. M. Molecular systematics and evolution of reproductive traits of North American freshwater unionacean mussels (Mollusca: Bivalvia) as inferred from 16S rRNA gene sequences. *Philosophical Transactions of the Royal Society B: Biological Sciences* **351**, 1593–1603; DOI:10.1098/rstb.1996.0143 (1996).
7. Jovelin, R. & Justine, J. L. Phylogenetic relationships within the polyopisthocotylean monogeneans (Platyhelminthes) inferred from partial 28S rDNA sequences. *International Journal for Parasitology* **31**, 393–401; DOI:10.1016/S0020-7519(01)00114-X (2001).
8. Talavera, G. & Castresana, J. Improvement of phylogenies after removing divergent and ambiguously aligned blocks from protein sequence alignments. *Systematic Biology* **56**, 564–577; DOI:10.1080/10635150701472164 (2007).
9. Tamura, K., Stecher, G., Peterson, D., Filipiński, A. & Kumar, S., MEGA6: Molecular Evolutionary Genetics Analysis version 6.0. *Molecular Biology and Evolution* **30**, 2725–2729; DOI:10.1093/molbev/mst197 (2013).
